# Supplementary material
Source: publisher site journal article supplement (https://www.dovepress.com/article/554362)
Supplement: Supplementary file 1 [file 554362%20Supplementary%20Tables.docx]

**Inflammation in Obstructive Sleep Apnea: A Global Bibliometric Perspective**

**Running title: Inflammation in OSA**

**Supplemental Tables**

**Supplementary Table 1.** Search terms used in Web of Science Core Collection (1996-2025)

**Supplementary Table 2.** Bibliometric Overview of Inflammation in Obstructive Sleep Apneas (1996–2025)

**Supplementary Table 3.** Most Relevant Countries by Corresponding Author Contributions (1996–2025)

**Supplementary Table 1.** Search terms used in Web of Science Core Collection (1996-2025)

| Category | Search Terms (Title, Abstract, Author Keywords) |
| --- | --- |
| Inflammation-related terms | Inflammation OR Inflammations OR Innate Inflammatory Response OR Inflammatory Response, Innate OR Innate Inflammatory Responses OR inflammatory OR inflammation biomarkers OR oxidative stress biomarkers OR endothelial biomarkers |
| OSA-related terms | Apneas, Obstructive Sleep OR Obstructive Sleep Apneas OR Sleep Apneas, Obstructive OR Apnea, Obstructive Sleep OR Sleep Apnea Hypopnea Syndrome OR Obstructive Sleep Apnea Syndrome OR Obstructive Sleep Apnea OR Syndrome, Obstructive Sleep Apnea OR Syndrome, Sleep Apnea, Obstructive OR Sleep Apnea Syndrome, Obstructive OR OSAHS OR Upper Airway Resistance Sleep Apnea Syndrome OR Syndrome, Upper Airway Resistance, Sleep Apnea OR sleep apnea, obstructive OR sleep apnea syndromes OR obstructive sleep apr* OR sleep apnea hypopnea syndrome OR OSA OR OSAH OR OSAS OR obstructive sleep apnea hypopnea syndrome |

**Supplementary Table 2.** Bibliometric Overview of Inflammation in Obstructive Sleep Apneas (1996–2025)

| **Description** | **Results** |
| --- | --- |
| MAIN INFORMATION ABOUT DATA |  |
| Timespan | 1996:2025 |
| Sources (Journals, Books, etc.) | 693 |
| Documents | 2075 |
| Annual Growth Rate % | 12.11 |
| Document Average Age | 7.84 |
| Average citations per doc | 39.67 |
| References | 71734 |
| DOCUMENT CONTENTS |  |
| Keywords Plus (ID) | 3894 |
| Author's Keywords (DE) | 3250 |
| AUTHORS |  |
| Authors | 9147 |
| Authors of single-authored docs | 52 |
| AUTHORS COLLABORATION |  |
| Single-authored docs | 66 |
| Co-Authors per Doc | 6.45 |
| International co-authorships % | 18.51 |
| DOCUMENT TYPES |  |
| Article | 1572 |
| Review | 503 |

**Supplementary Table 3.** Most Relevant Countries by Corresponding Author Contributions

| Rank | **Country** | **Articles** | **Articles %** | **SCP** | **MCP** | **MCP %** |
| --- | --- | --- | --- | --- | --- | --- |
| 1 | China | 510 | 24.6 | 463 | 47 | 9.2 |
| 2 | USA | 488 | 23.5 | 394 | 94 | 19.3 |
| 3 | Italy | 122 | 5.9 | 103 | 19 | 15.6 |
| 4 | Turkey | 103 | 5 | 96 | 7 | 6.8 |
| 5 | Spain | 74 | 3.6 | 57 | 17 | 23 |
| 6 | Canada | 61 | 2.9 | 47 | 14 | 23 |
| 7 | France | 55 | 2.7 | 37 | 18 | 32.7 |
| 8 | Brazil | 53 | 2.6 | 40 | 13 | 24.5 |
| 9 | Greece | 47 | 2.3 | 42 | 5 | 10.6 |
| 10 | Australia | 46 | 2.2 | 39 | 7 | 15.2 |
| 11 | UK | 46 | 2.2 | 26 | 20 | 43.5 |
| 12 | Poland | 41 | 2 | 34 | 7 | 17.1 |
| 13 | Japan | 39 | 1.9 | 35 | 4 | 10.3 |
| 14 | Israel | 37 | 1.8 | 33 | 4 | 10.8 |
| 15 | Germany | 34 | 1.6 | 28 | 6 | 17.6 |
| 16 | Republic of Korea | 34 | 1.6 | 29 | 5 | 14.7 |
| 17 | Ireland | 32 | 1.5 | 26 | 6 | 18.8 |
| 18 | Chile | 17 | 0.8 | 11 | 6 | 35.3 |
| 19 | India | 17 | 0.8 | 15 | 2 | 11.8 |
| 20 | Iran | 14 | 0.7 | 7 | 7 | 50 |
| 21 | Romania | 13 | 0.6 | 11 | 2 | 15.4 |
| 22 | Sweden | 13 | 0.6 | 7 | 6 | 46.2 |
| 23 | Hungary | 12 | 0.6 | 5 | 7 | 58.3 |
| 24 | PORTUGAL | 11 | 0.5 | 8 | 3 | 27.3 |
| 25 | BELGIUM | 9 | 0.4 | 7 | 2 | 22.2 |

Abbreviation: SCP :Single Country Publications; MCP :Multiple Country Publications
